# Supplementary material
Source: publisher figshare collection journal article supplement (https://springernature.figshare.com/ndownloader/files/15200162)
Supplement: Supplementary file [file 15200162]

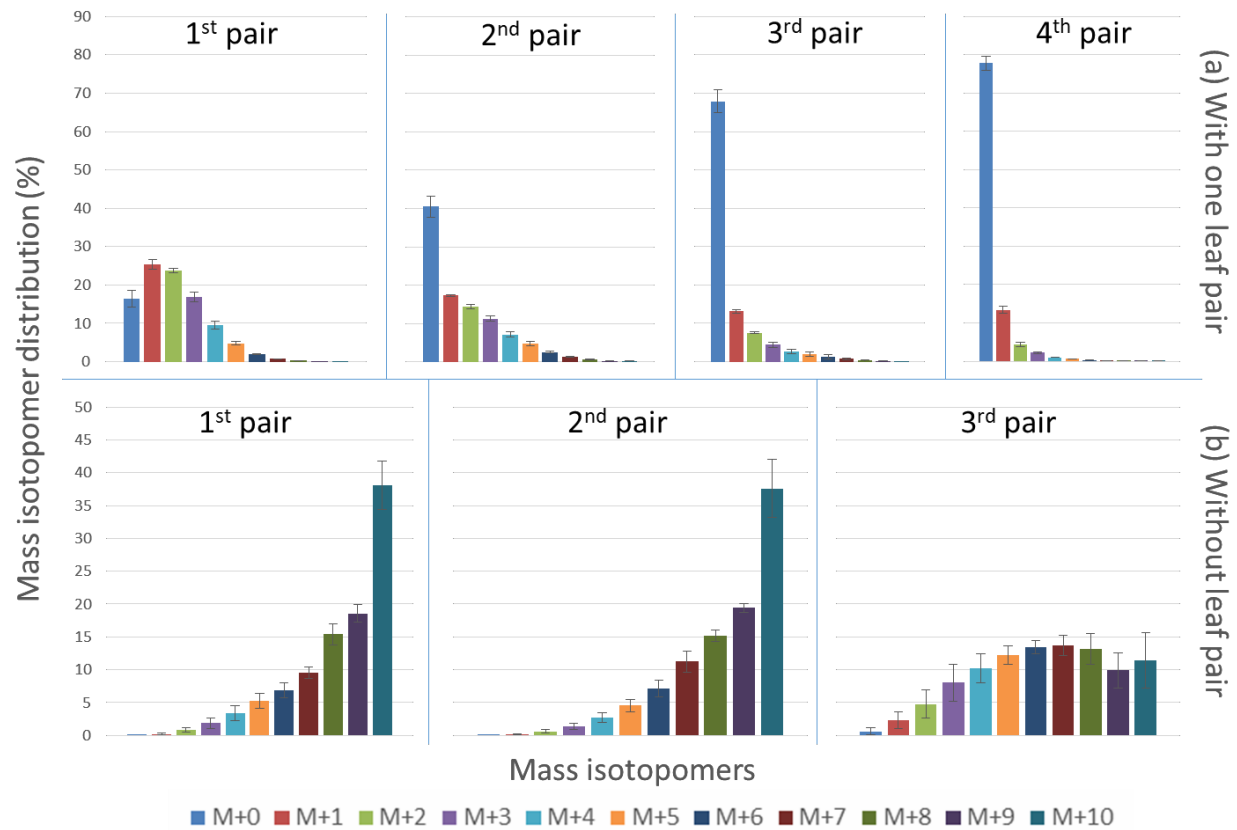

Figure S1. Mass isotopomer distribution (%) of isopulegone in each leaf pair at  $30 \mu\text{mol m}^{-2} \text{s}^{-1}$  light intensity. (a) Shoot-tip culture was initiated with one developing leaf pair and after 15 days of culture, total four leaf pairs (older than 6 days) were observed. (b) Shoot-tip culture started without leaves and after 15 DALV, total three leaf pairs (older than 6 days) were observed (mean  $\pm$  standard error,  $n=5$ ).

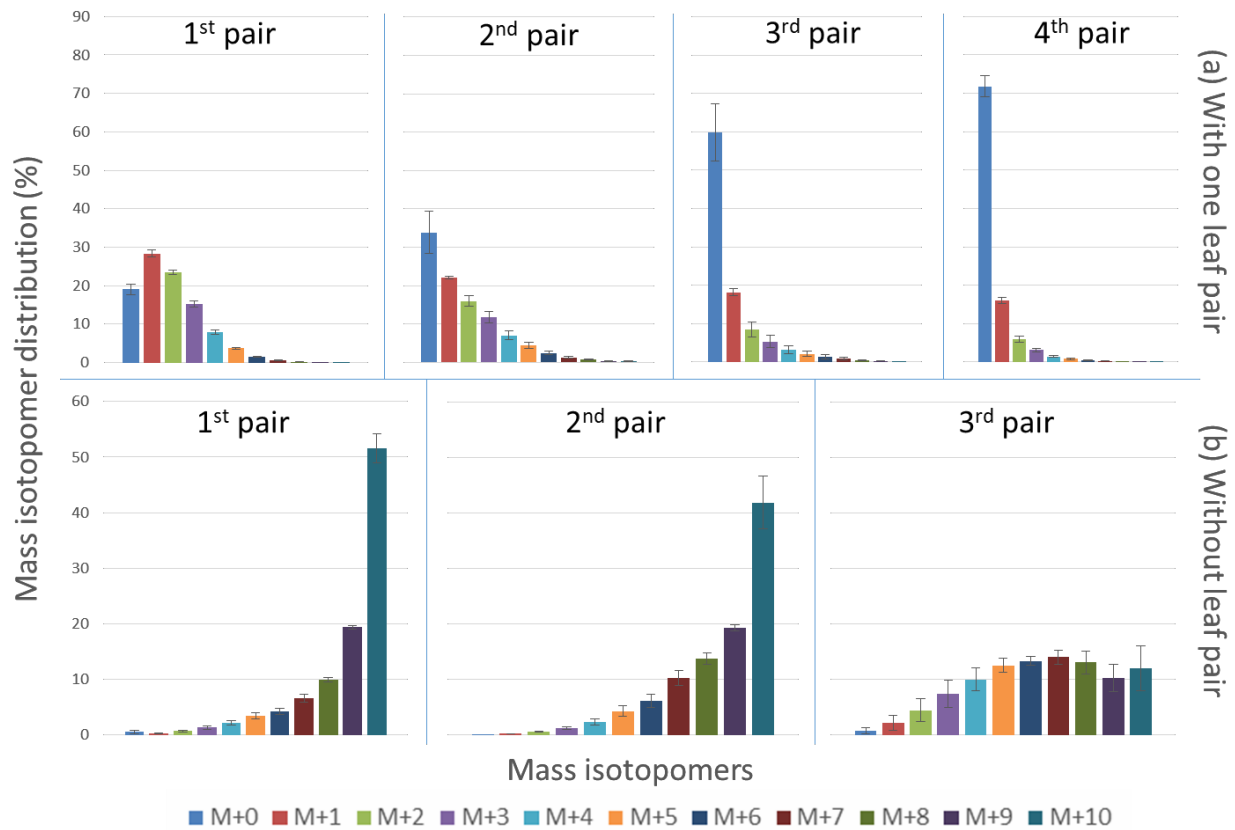

Figure S2. Mass isotopomer distribution (%) of menthofuran in each leaf pair at  $30 \mu\text{mol m}^{-2} \text{s}^{-1}$  light intensity. (a) Shoot-tip culture initiated with one developing leaf pair and after 15 days of culture, total four leaf pairs (older than 6 days) were observed. (b) Shoot-tip culture started without leaves and after 15 DALV, total three leaf pairs (older than 6 days) were observed (mean  $\pm$  standard error,  $n=5$ ).

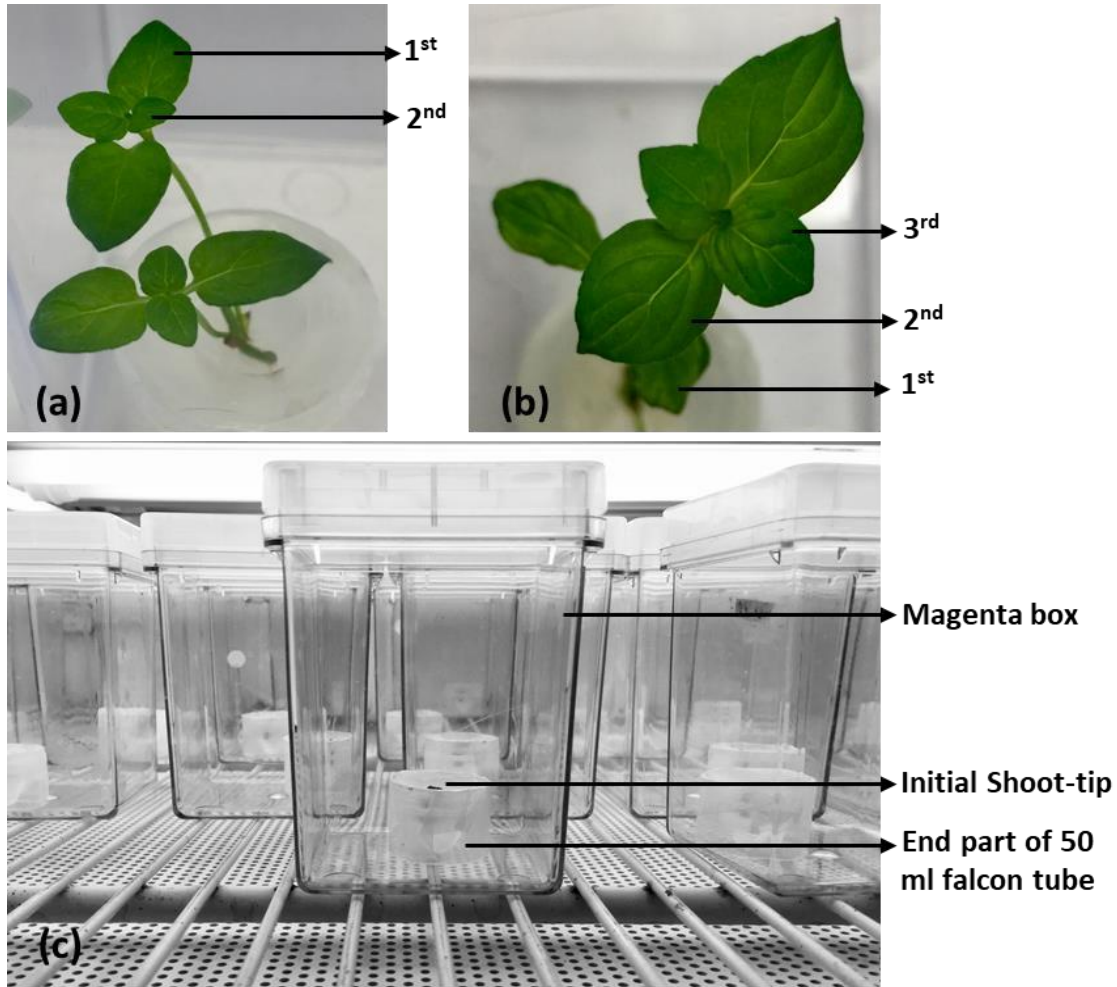

Figure S3. Photographs of shoot-tip culture (a) Shoot-tip culture at 15 DALV under 5  $\mu\text{mol m}^{-2} \text{s}^{-1}$  light intensity (b) Shoot-tip culture at 20 DALV under 5  $\mu\text{mol m}^{-2} \text{s}^{-1}$  light intensity (c) Overview of shoot- tip culture system inside growth chamber. Two and three leaf pairs (older than 6 days) were observed at 15 and 20 DALV, respectively.

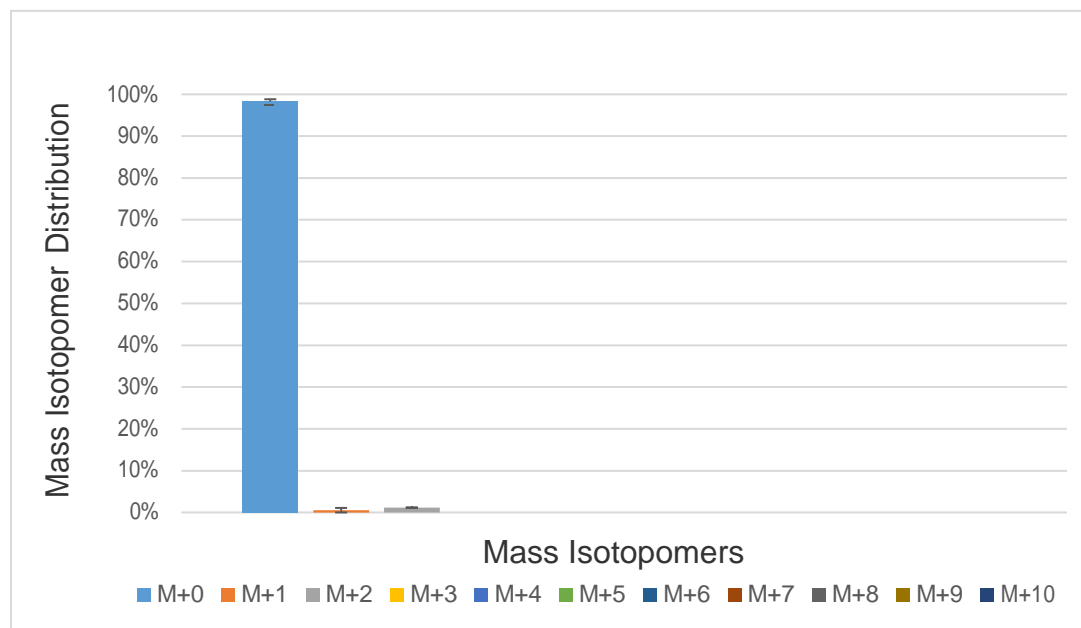

Figure S4. Mass isotopomer distribution (%) of pulegone in control shoot-tips, nurtured with unlabelled glucose as sole carbon source. Calculated label dilution in this control shoot-tips was 99.74% (after natural abundance correction) with negligible amounts of  $^{13}\text{C}$  (0.26%) was considered as an experimental or measurement error (mean  $\pm$  standard error, n=5). This result remained virtually similar in control treatments within leaves of different age grown under different light intensities.

Table S1. Consumption of glucose (mg) by shoot-tip culture. Glucose consumption was measured after 15 DALV growth of the shoot-tip culture under different light intensities (mean  $\pm$  standard error, n=5).

| <b>Light intensity (<math>\mu\text{mol m}^{-2} \text{s}^{-1}</math>)</b> | <b>Total glucose needed (mg/shoot culture)</b> |
|--------------------------------------------------------------------------|------------------------------------------------|
| 5                                                                        | 41.4 $\pm$ 1.8                                 |
| 10                                                                       | 47.1 $\pm$ 1.2                                 |
| 20                                                                       | 54.8 $\pm$ 2.6                                 |
| 30                                                                       | 46.3 $\pm$ 2.4                                 |

Table S2. Production of photosynthetic pigments and volatile terpenes in 15 days old leaves from *in vivo* plants. Leaves were collected from the peppermint plant grown under natural condition (mean  $\pm$  standard error, n=5).

| <b>Metabolites</b>                                        | <b>Quantity</b>        |
|-----------------------------------------------------------|------------------------|
| Chlorophyll (mg g <sup>-1</sup> leaf fresh weight)        |                        |
| Chl a                                                     | 1.53 $\pm$ 0.03        |
| Chl b                                                     | 1.00 $\pm$ 0.07        |
| Total (a+b)                                               | 2.54 $\pm$ 0.09        |
| Chl (a/b)                                                 | 1.54                   |
| Carotenoids (mg g <sup>-1</sup> leaf fresh weight)        | 0.31 $\pm$ 0.02        |
| Volatile terpenes (ng mg <sup>-1</sup> leaf fresh weight) |                        |
| Pinene $\alpha$                                           | 163.38 $\pm$ 27.92     |
| Sabinene                                                  | 78.90 $\pm$ 13.28      |
| Pinene $\beta$                                            | 315.86 $\pm$ 49.07     |
| Myrcene                                                   | 90.27 $\pm$ 16.37      |
| Limonene                                                  | 33.70 $\pm$ 6.83       |
| 1,8-Cineole                                               | 1110.72 $\pm$ 161.46   |
| Sabinene Hydrate                                          | 271.72 $\pm$ 59.57     |
| Menthone                                                  | 9599.41 $\pm$ 2651.2   |
| Menthofuran                                               | 2226.18 $\pm$ 346.1    |
| Isopulegone                                               | 684.64 $\pm$ 65.57     |
| Pulegone                                                  | 2846.56 $\pm$ 262.95   |
| Germacrene D                                              | 91.89 $\pm$ 15.84      |
| Total volatile terpene                                    | 17513.25 $\pm$ 3333.95 |

Table S3. Photosynthetic assimilation rates of 15 days old leaves from shoot-tip cultures and normal plants. The measurements were taken using the LI-6400XT portable gas exchange system (Li-Cor Inc., Lincoln, NE, USA) (mean  $\pm$  standard error, n=5).

| Light intensity ( $\mu\text{mol m}^{-2} \text{s}^{-1}$ ) | Assimilation rate ( $\mu\text{mol (CO}_2\text{) m}^{-2}$ (leaf area) $\text{s}^{-1}$ ) |                    |
|----------------------------------------------------------|----------------------------------------------------------------------------------------|--------------------|
|                                                          | Shoot-tip cultures                                                                     | Normal plants      |
| 5                                                        | $-0.402 \pm 0.094$                                                                     | $-0.482 \pm 0.114$ |
| 10                                                       | $-0.129 \pm 0.089$                                                                     | $-0.101 \pm 0.056$ |
| 20                                                       | $0.433 \pm 0.082$                                                                      | $0.461 \pm 0.123$  |
| 30                                                       | $0.518 \pm 0.077$                                                                      | $0.661 \pm 0.112$  |

Table S4. Details of measured amino acids and their fragments

| <b>Measured amino acids</b> | <b>Source intermediate(s)</b>                     | <b>Compartments</b><br>(Dersch et al., 2016) | <b>Analysed fragments</b> |
|-----------------------------|---------------------------------------------------|----------------------------------------------|---------------------------|
| Tyrosine (Tyr)              | Phosphoenol pyruvate and<br>Erythrose 4-phosphate | Plastid                                      | 364 (M-57)                |
| Serine (Ser)                | 3-phosphoglyceric acid                            | Cytosol                                      | 362 (M-85)                |
| Alanine (Ala)               | Pyruvate                                          | Cytosol                                      | 232 (M-85)                |
| Lysine (Lys)                | Oxaloacetic acid                                  | Cytosol                                      | 431 (M-57)                |
| Proline (Pro)               | $\alpha$ -ketoglutarate                           | Mitochondria                                 | 258 (M-85)                |



Table S5. Label dilution (%) into monoterpene in two leaf pairs of oregano shoot-tip culture after 15 DALV under  $10 \mu\text{mol m}^{-2} \text{s}^{-1}$  light intensity. Labelled U- $^{13}\text{C}$  glucose (2%) was supplemented in the basal media (mean  $\pm$  standard error, n=5).

| <b>Leaf pair</b> | <b>Label dilution (%)</b> |
|------------------|---------------------------|
| First            | $1.83 \pm 0.19$           |
| Second           | $1.36 \pm 0.05$           |
